# Supplementary material
Source: publisher site journal article supplement (https://www.dovepress.com/article/467583)
Supplement: Supplementary file 1 [file get_supplementary_file.php]

**Supplementary table 1. Baseline characteristics of high and low NLR patients.**

| <b>Variable</b>                           | <b>Total (n = 293)</b> | <b>NLR &lt; 4.9 (n = 162)</b> | <b>NLR ≥ 4.9 (n = 131)</b> | <b>P</b> |
|-------------------------------------------|------------------------|-------------------------------|----------------------------|----------|
| Age, M (Q <sub>1</sub> , Q <sub>3</sub> ) | 59.0 (49.0 - 67.0)     | 60.0 (50.0 - 67.0)            | 59.0 (48.5 - 67.0)         | 0.692    |
| Gender, n (%)                             |                        |                               |                            | 0.314    |
| male                                      | 174 (59.4)             | 92 (56.8)                     | 82 (62.6)                  |          |
| female                                    | 119 (40.6)             | 70 (43.2)                     | 49 (37.4)                  |          |
| Etiology                                  |                        |                               |                            | 0.221    |
| HBV                                       | 169 (57.7)             | 88 (54.3)                     | 81 (61.8)                  |          |
| AIH                                       | 43 (14.7)              | 25 (15.4)                     | 18 (13.7)                  |          |
| schistosomiasis                           | 41 (14.0)              | 26 (16.1)                     | 15 (11.5)                  |          |
| others                                    | 40 (13.7)              | 23 (14.2)                     | 17 (13.0)                  |          |
| Early TIPS                                | 148 (50.5)             | 70 (43.2)                     | 78 (59.5)                  | 0.005    |

|                                                                |                    |                    |                    |       |
|----------------------------------------------------------------|--------------------|--------------------|--------------------|-------|
| Ascites, n (%)                                                 | 155 (52.9)         | 86 (53.1)          | 69 (52.7)          | 0.944 |
| Portal vein thrombosis, n (%)                                  | 81 (27.7)          | 44 (27.2)          | 37 (28.2)          | 0.837 |
| Diabetes, n (%)                                                | 68 (23.2)          | 38 (23.5)          | 30 (22.9)          | 0.911 |
| Splenectomy, n (%)                                             | 40 (13.7)          | 26 (16.1)          | 14 (10.7)          | 0.184 |
| Presence of gastric varices, n (%)                             | 53 (18.1)          | 29 (17.9)          | 24 (18.3)          | 0.926 |
| Child-Pugh score, M (Q <sub>1</sub> , Q <sub>3</sub> )         | 7.0 (6.0 - 9.0)    | 7.0 (6.0 - 8.0)    | 7.0 (6.0 - 9.0)    | 0.624 |
| Child-Pugh grade, n (%)                                        |                    |                    |                    | 0.091 |
| A                                                              | 101 (34.5)         | 54 (33.3)          | 47 (35.9)          |       |
| B                                                              | 159 (54.3)         | 95 (58.6)          | 64 (48.9)          |       |
| C                                                              | 33 (11.3)          | 13 (8.0)           | 20 (15.3)          |       |
| MELD score, M (Q <sub>1</sub> , Q <sub>3</sub> )               | 11.0 (9.0 - 13.0)  | 10.0 (9.0 - 12.0)  | 11.0 (9.0 - 13.0)  | 0.111 |
| Total bilirubin (μmol/L), M (Q <sub>1</sub> , Q <sub>3</sub> ) | 21.3 (15.4 - 29.9) | 20.3 (14.9 - 28.6) | 22.4 (16.0 - 31.3) | 0.146 |

|                                                                              |                     |                     |                     |         |
|------------------------------------------------------------------------------|---------------------|---------------------|---------------------|---------|
| Albumin (g/L), M (Q <sub>1</sub> , Q <sub>3</sub> )                          | 30.7 (26.9 - 34.3)  | 30.9 (27.4 - 34.3)  | 30.4 (26.5 - 33.6)  | 0.245   |
| Pre-albumin (g/L), M (Q <sub>1</sub> , Q <sub>3</sub> )                      | 88.8 (63.2 - 110.1) | 89.5 (66.6 - 109.6) | 87.2 (60.0 - 112.3) | 0.635   |
| Creatinine (μmol/L), M (Q <sub>1</sub> , Q <sub>3</sub> )                    | 62.8 (53.0 - 74.4)  | 63.2 (54.0 - 73.6)  | 62.0 (51.7 - 76.2)  | 0.558   |
| Prothrombin time (S), M (Q <sub>1</sub> , Q <sub>3</sub> )                   | 15.9 (14.3 - 17.3)  | 15.4 (14.1 - 17.0)  | 16.1 (14.7 - 17.7)  | 0.016   |
| International normalized ratio, M (Q <sub>1</sub> , Q <sub>3</sub> )         | 1.34 (1.21 - 1.48)  | 1.30 (1.19 - 1.47)  | 1.37 (1.23 - 1.48)  | 0.072   |
| Platelet count (×10 <sup>9</sup> /L), M (Q <sub>1</sub> , Q <sub>3</sub> )   | 69.0 (48.0 - 102.0) | 67.0 (48.3 - 103.8) | 70.0 (47.5 - 101.0) | 0.754   |
| White blood cell (×10 <sup>9</sup> /L), M (Q <sub>1</sub> , Q <sub>3</sub> ) | 4.9 (2.9 - 7.6)     | 3.9 (2.4 - 5.8)     | 6.6 (4.0 - 10.4)    | < 0.001 |
| Neutrophil count (×10 <sup>9</sup> /L), M (Q <sub>1</sub> , Q <sub>3</sub> ) | 3.0 (1.7 - 5.5)     | 2.0 (1.3 - 3.1)     | 5.3 (3.4 - 7.9)     | < 0.001 |
| Lymphocyte count (×10 <sup>9</sup> /L), M (Q <sub>1</sub> , Q <sub>3</sub> ) | 0.7 (0.5 - 1.0)     | 0.8 (0.6 - 1.3)     | 0.5 (0.4 - 0.8)     | < 0.001 |
| NLR, M (Q <sub>1</sub> , Q <sub>3</sub> )                                    | 4.4 (2.5 - 9.2)     | 2.6 (1.7 - 3.4)     | 9.7 (6.6 - 13.8)    | < 0.001 |
| Pre-TIPS PPG (mmHg), M (Q <sub>1</sub> , Q <sub>3</sub> )                    | 26.0 (22.0 - 32.0)  | 26.5 (22.0 - 33.0)  | 26.0 (22.0 - 31.0)  | 0.690   |
| Portal vein puncture, n (%)                                                  |                     |                     |                     | 0.002   |

|                   |            |           |           |
|-------------------|------------|-----------|-----------|
| left portal vein  | 185 (63.1) | 88 (54.3) | 97 (74.1) |
| right portal vein | 51 (17.4)  | 37 (22.8) | 14 (10.7) |
| main portal vein  | 57 (19.5)  | 37 (22.8) | 20 (15.3) |

---

Note: Data are expressed as median (IQR) or *n* (%). Abbreviations: HBV, hepatitis B virus; AIH, autoimmune hepatitis; MELD, model for end-stage liver disease; NLR, neutrophil-to-lymphocyte ratio; TIPS, transjugular intrahepatic portosystemic shunt; PPG, portal pressure gradient.

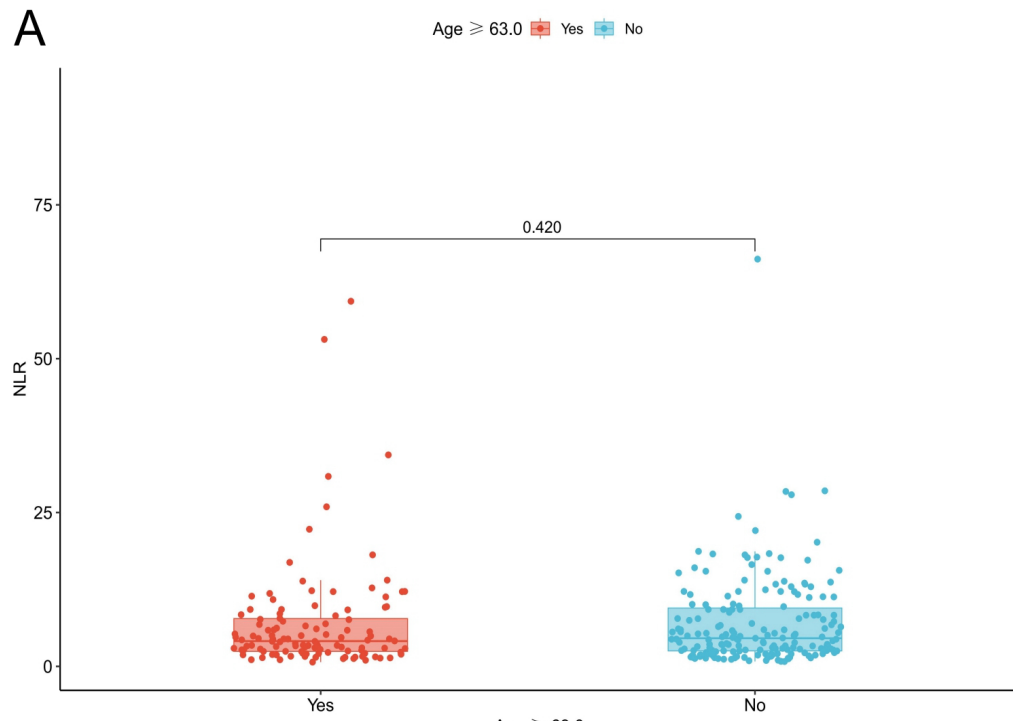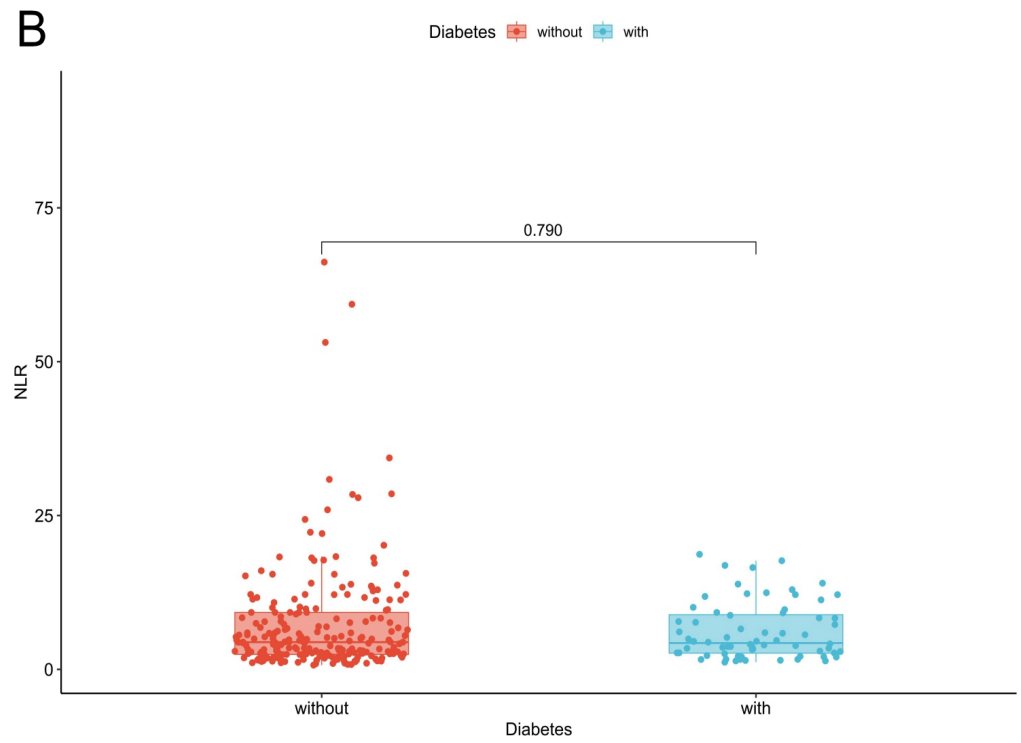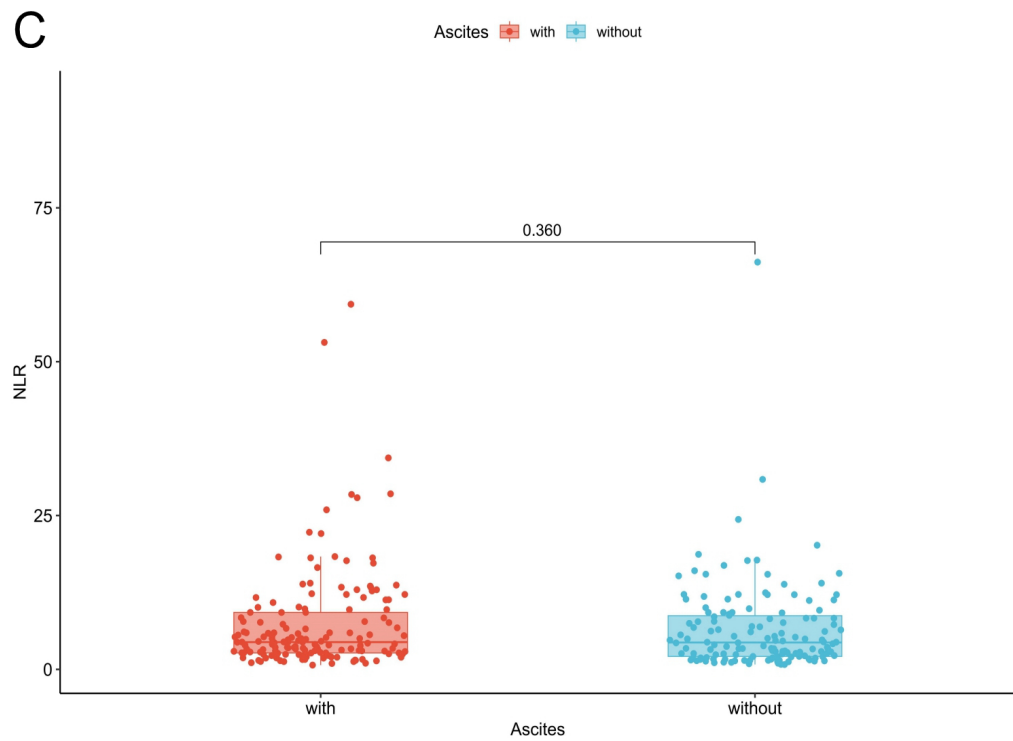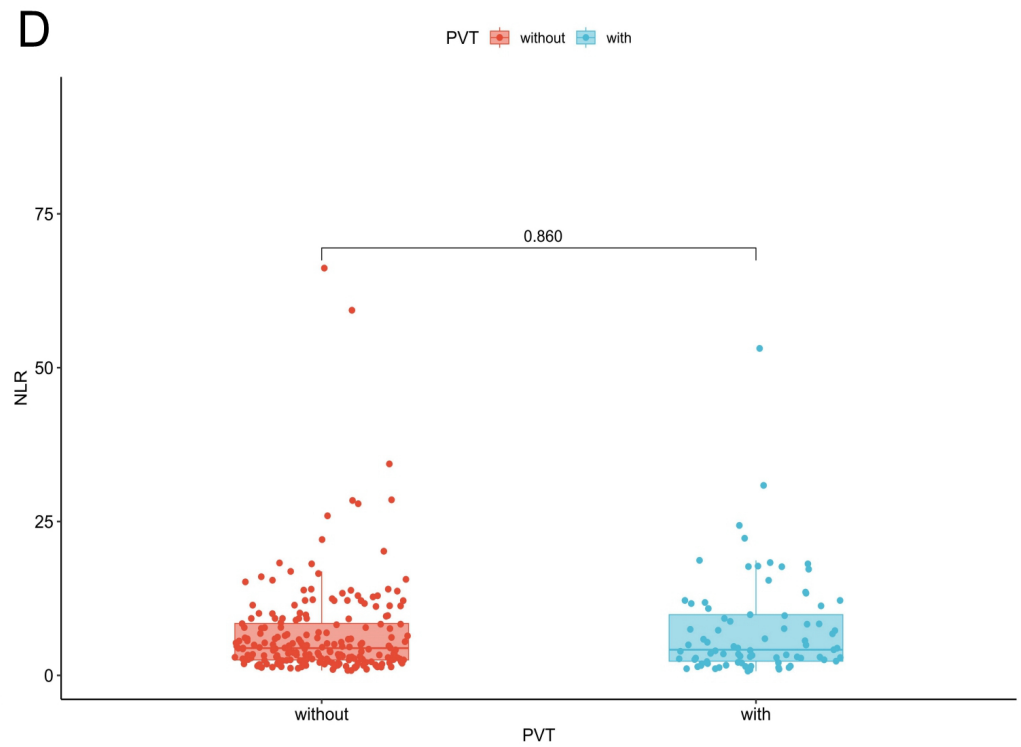

### Spearman Correlation with Death

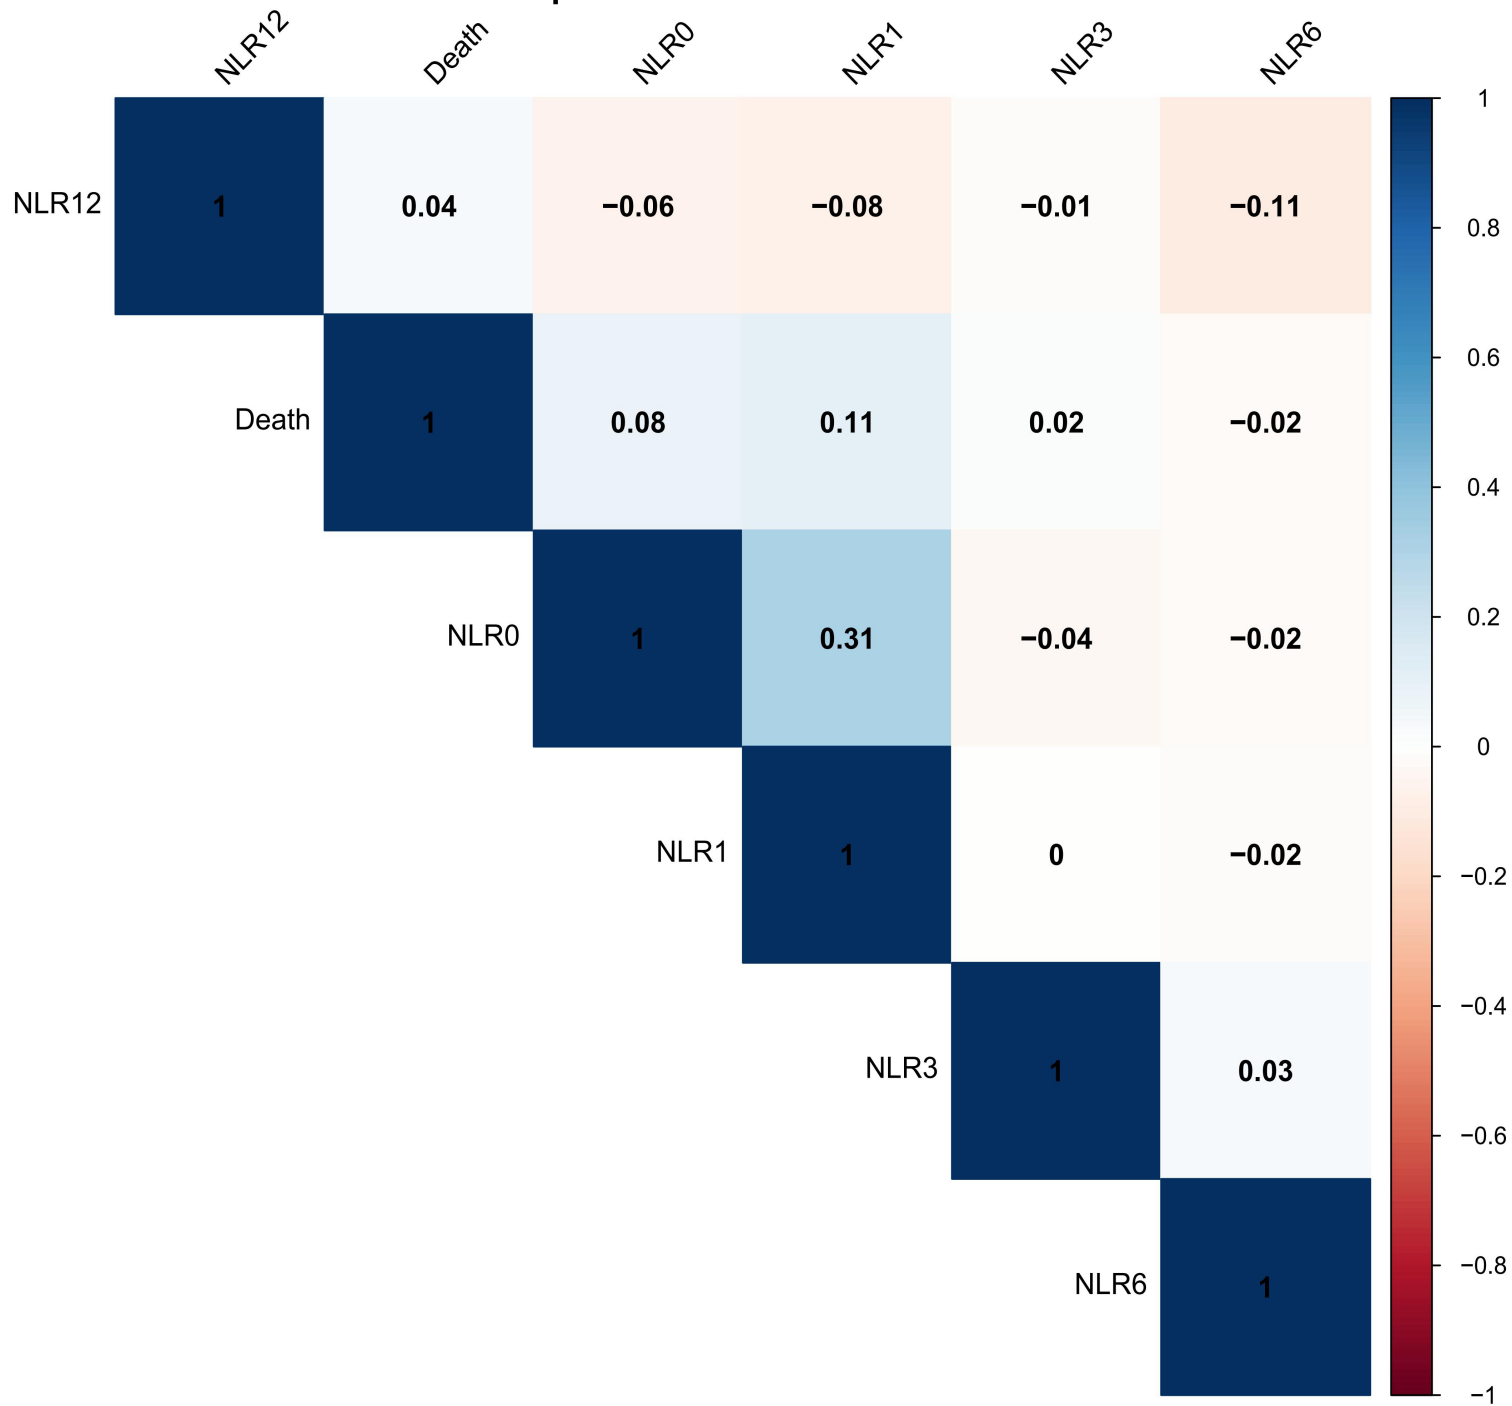

### **Figure legends for supplementary figures**

**Supplementary Figure 1:** Distribution of NLR in different subgroups. (A) Age; (B) Diabetes; (C) Ascites; (D) PVT. NLR, neutrophil-to-lymphocyte ratio; PVT, portal vein thrombosis.

**Supplementary Figure 2:** Heatmap of Spearman correlation coefficients between NLR and the risk of mortality. The correlations between NLR values at 1 month, 3 months, 6 months, and 12 months post-TIPS placement and the risk of mortality were 0.107, 0.016, -0.021, and 0.036, respectively. NLR, neutrophil-to-lymphocyte ratio; TIPS, transjugular intrahepatic portosystemic shunt.
